# Supplementary material
Source: PubMed Central journal article supplement (PMC3969547)

**Supplementary Figure 1.** Gating strategy used for measuring activated T cells in blood and semen by flow cytometry. Cells were first gated on lymphocytes, then CD3<sup>+</sup> T cells, followed by CD4<sup>+</sup>/CD8<sup>+</sup> gating. Next CD4<sup>+</sup> and CD8<sup>+</sup> T cells expressing either CCR5 or CD38 were gated on.

**Supplementary Figure 2.** Depicted in (A) is a direct comparison of viral loads in each participant and in (B) the relationship between HIV viral loads in blood and semen.

Supplementary  
Figure 1

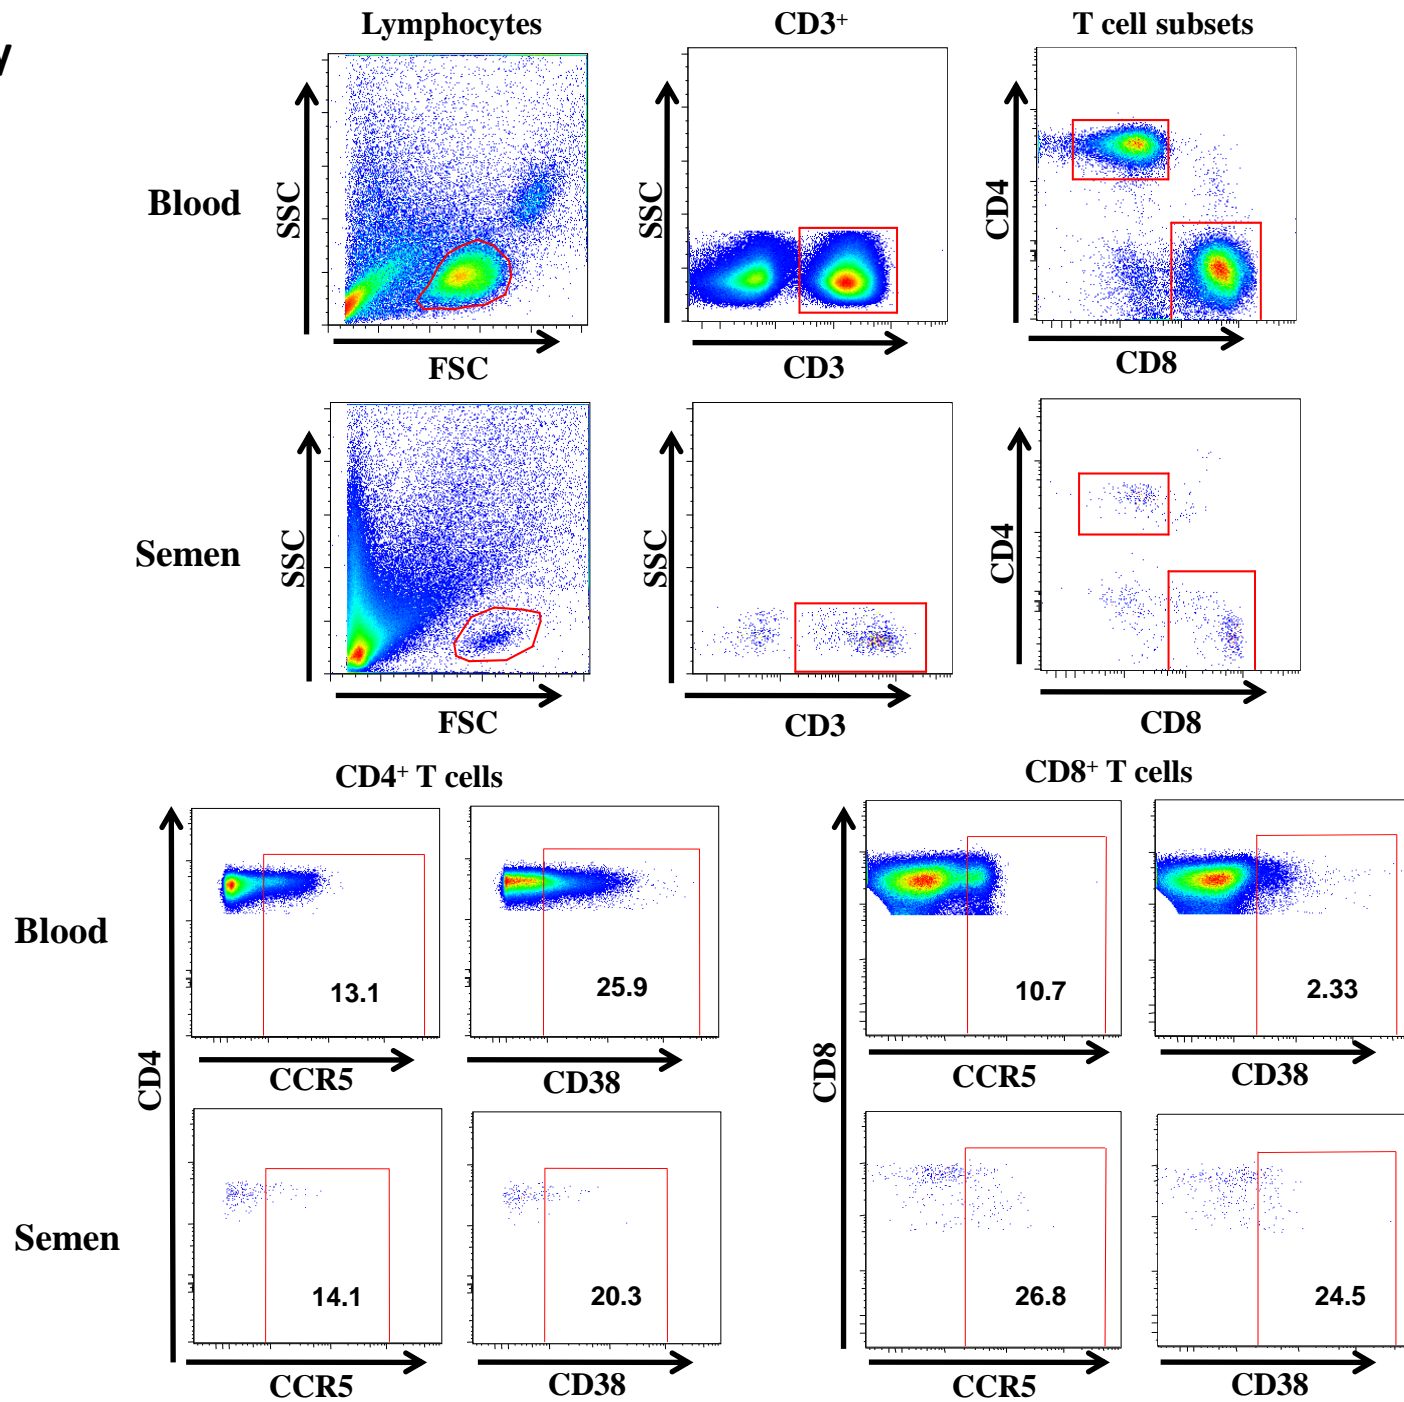

# Supplementary Figure 2

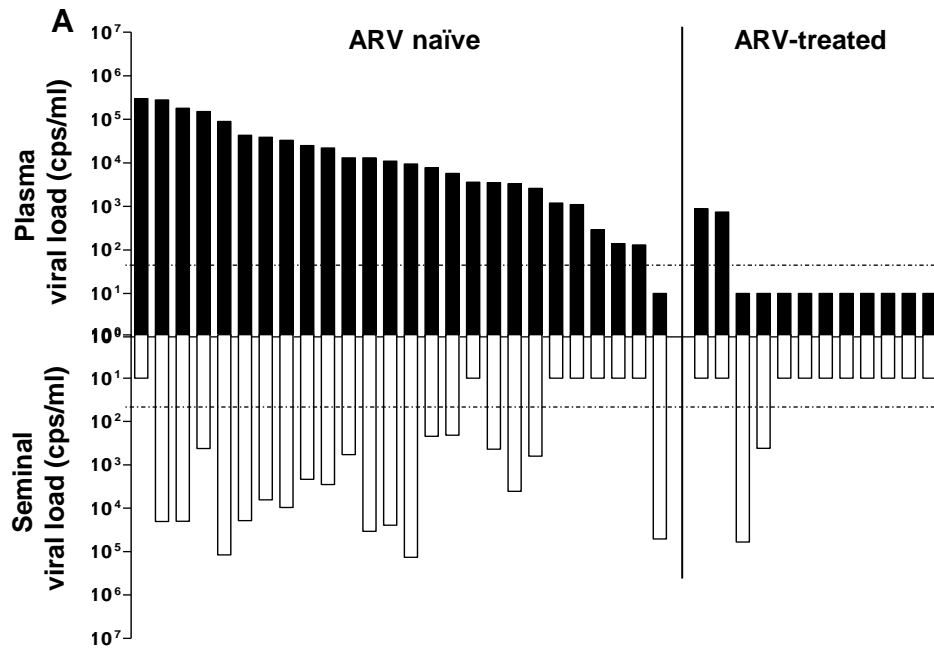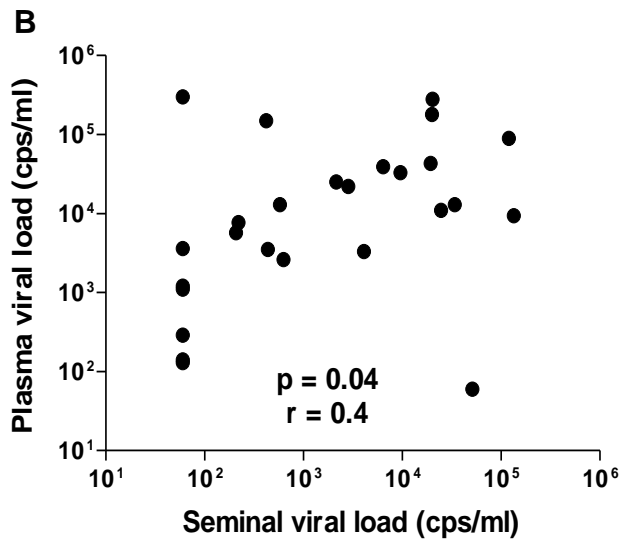

Supplement: supp_jit649_jit649supp.pdf [file supp_jit649_jit649supp.pdf]
